# Supplementary material
Source: publisher figshare collection journal article supplement (https://acs.figshare.com/ndownloader/files/7227104)
Supplement: Supplementary file 1 [file 7227104]

Compound_ID	SMILES
1	O=C([C@@H](NC1=O)CC(O)=O)N[C@@H]2CN(CCCCN(N=N3)C=C3CCC(NCCNC(C4=C(C)NC(/C=C(C5=CC(F)=CC=C5N6)\C6=O)=C4C)=O)=O)[C@H](C(N[C@@H](CCCNC(N)=N)C(NC1)=O)=O)C2
2	O=C([C@@H](NC1=O)CC(O)=O)N[C@@H]2CN(CCCCN(N=N3)C=C3COCCOCCOCCN(CC)CCNC(C4=C(C)NC(/C=C(C5=CC(F)=CC=C5N6)\C6=O)=C4C)=O)[C@H](C(N[C@@H](CCCNC(N)=N)C(NC1)=O)=O)C2
3	CC1=C(/C=C(C2=CC(F)=CC=C2N3)\C3=O)NC(C)=C1C(NCCN(CCOCCOCCNC(C4=CC(OCC5=CN(CCCCN6C[C@@H](NC([C@@H](NC7=O)CC(O)=O)=O)C[C@H]6C(N[C@@H](CCCNC(N)=N)C(NC7)=O)=O)N=N5)=CC(OCC8=CN(CCCCN9C[C@@H](NC([C@@H](NC%10=O)CC(O)=O)=O)C[C@H]9C(N[C@@H](CCCNC(N)=N)C(NC%10)=O)=O)N=N8)=C4)=O)CC)=O
4a	O=C(OCC1C(C=CC=C2)=C2C3=C1C=CC=C3)N[C@H]4C[C@@H](C(O)=O)NC4
5	O=C(OCC1C(C=CC=C2)=C2C3=C1C=CC=C3)N[C@H]4C[C@@H](C(O)=O)N(CCCCN=[N+]=[N-])C4
7	O=C([C@H](CC(OC(C)(C)C)=O)NC1=O)N[C@H]2C[C@@H](C(N[C@@H](CCCNC(NS(=O)(C3=C(C)C(CCC(C)(C)O4)=C4C(C)=C3C)=O)=N)C(NC1)=O)=O)N(CCCCN=[N+]=[N-])C2
8	O=C([C@H](CC(O)=O)NC1=O)N[C@H]2C[C@@H](C(N[C@@H](CCCNC(N)=N)C(NC1)=O)=O)N(CCCCN=[N+]=[N-])C2
10	O=C1NC2=CC=C(F)C=C2C1
12	CC1=C(C(O)=O)C(C)=C(C=O)N1
13	CC1=C(C(O)=O)C(C)=C(/C=C(C2=CC(F)=CC=C2N3)\C3=O)N1
14	O=C(NCCN)CCC#C
15	CC1=C(C(NCCNC(CCC#C)=O)=O)C(C)=C(/C=C(C2=CC(F)=CC=C2N3)\C3=O)N1
16	C#CCOCCOCCOCCN(CC)CCN
17	C#CCOCCOCCOCCN(CC)CCNC(C1=C(C)NC(/C=C(C2=CC(F)=CC=C2N3)\C3=O)=C1C)=O
18	NCCN(CCOCCOCCNC(C1=CC(OCC#C)=CC(OCC#C)=C1)=O)CC
19	CCN(CCOCCOCCNC(C1=CC(OCC#C)=CC(OCC#C)=C1)=O)CCNC(C2=C(C)NC(/C=C(C3=CC(F)=CC=C3N4)\C4=O)=C2C)=O
22	C#CCOCCOCCOCCOS(=O)(C1=CC=C(C)C=C1)=O
23	O=C(OC(C)(C)C)NCCNCC
24	C#CCOCCOCCOCCN(CCNC(OC(C)(C)C)=O)CC
25	C#CCOC1=CC(C(NCCOCCOCCN(CC)CCNC(OC(C)(C)C)=O)=O)=CC(OCC#C)=C1
26	C#CCOC1=CC(C(NCCOCCOCCOCCOS(=O)(C2=CC=C(C)C=C2)=O)=O)=CC(OCC#C)=C1
27	C#CCOC1=CC(C(NCCOCCOCCOCCO)=O)=CC(OCC#C)=C1
28	N[C@H](C(OCC1=CC=CC=C1)=O)CC#C
29	O=C(N[C@H](C(OCC1=CC=CC=C1)=O)CC#C)CCCNC(OC(C)(C)C)=O
30	O=C([C@H](CC(OC(C)(C)C)=O)NC1=O)N[C@H]2C[C@@H](C(N[C@@H](CCCNC(NS(=O)(C3=C(C)C(CCC(C)(C)O4)=C4C(C)=C3C)=O)=N)C(NC1)=O)=O)N(CCN5C=C(N=N5)CC(NC(CCCNC(OC(C)(C)C)=O)=O)C(OCC6=CC=CC=C6)=O)C2
31	O=C([C@H](CC(O)=O)NC1=O)N[C@H]2C[C@@H](C(N[C@@H](CCCNC(N)=N)C(NC1)=O)=O)N(CCN3C=C(N=N3)C[C@H](NC(CCCN)=O)C(OCC4=CC=CC=C4)=O)C2
32	O=C([C@H](CC(O)=O)NC1=O)N[C@H]2C[C@@H](C(N[C@@H](CCCNC(N)=N)C(NC1)=O)=O)N(CCN3C=C(N=N3)C[C@H](NC(CCCNC(NC(C=C4)=CC5=C4C6(OC5=O)C7=C(C=C(O)C=C7)OC8=CC(O)=CC=C86)=S)=O)C(OCC9=CC=CC=C9)=O)C2
